# Supplementary material for: Tunable p-type doping of Si nanostructures for near infrared light photodetector application
Source: Royal Society of Chemistry journal article supplement (doi:10.1039/c4ra16781c), 2015-01-01
Supplement: c4ra16781c1.pdf [file c4ra16781c1.pdf]

Supporting information

## Tunable *p*-type doping of Si nanostructures for near infrared light photodetector application

By Feng-Xia Liang, Yi-Feng Zou, Teng-Fei Zhang, Yu-Cheng Wu, Lin-Bao Luo

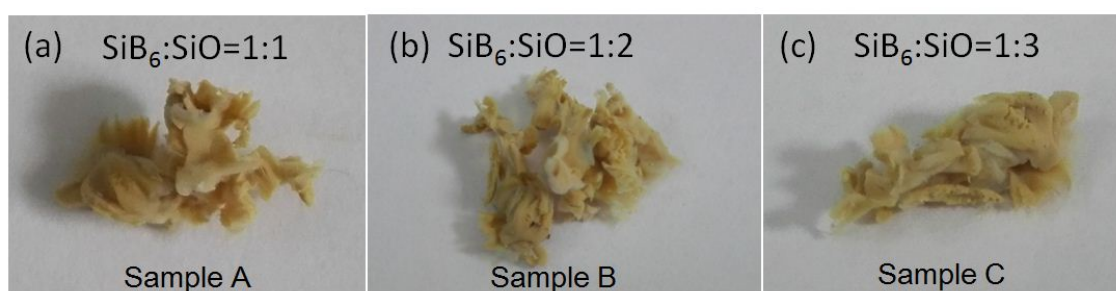

Figure S1. Digital camera pictures of the as prepared silicon nanostructures (Sample A, B, and C).

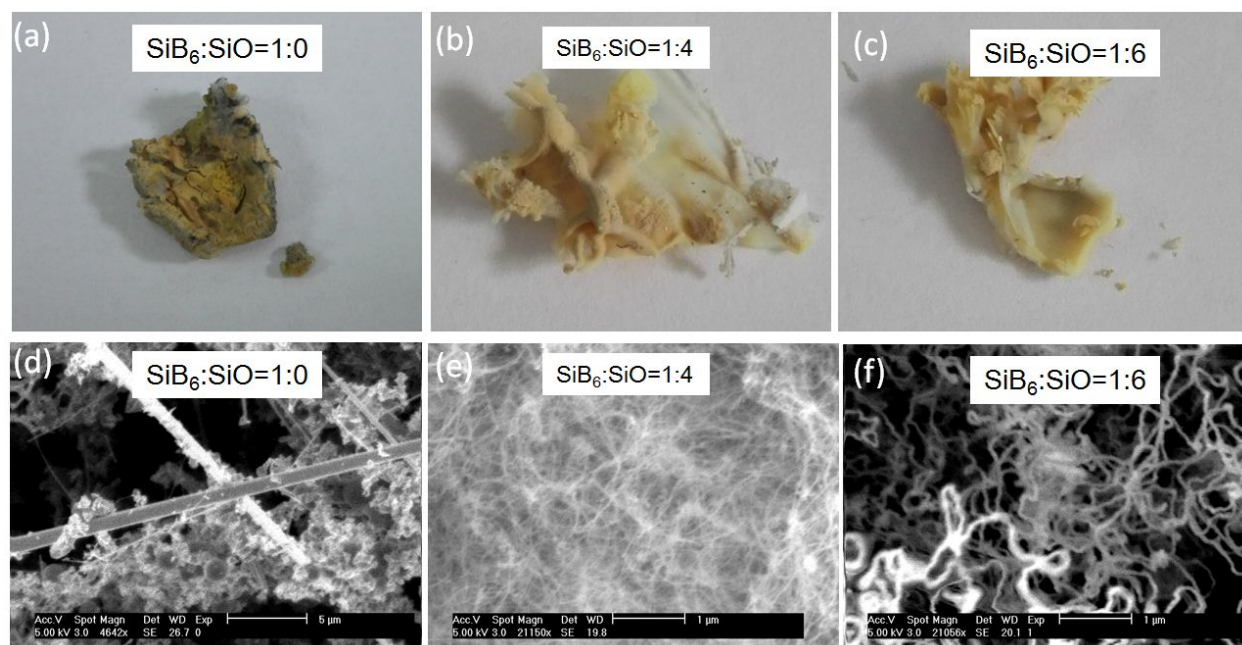

Figure S2. Digital camera pictures and SEM images of products obtained from a mixed powder of SiB<sub>6</sub> and SiO in the ratio of 1:0 (a, d), 1:4 (b, e), and 1:6 (c, f), respectively.

Table S1. Standard deviation of B% as a function of multiple preparation attempts for Sample A

|              | NO. 1       | NO. 2       | No. 3       | No. 4       | No. 5       |
|--------------|-------------|-------------|-------------|-------------|-------------|
| B% of sample | 1.28%±0.015 | 1.31%±0.014 | 1.27%±0.011 | 1.30%±0.016 | 1.29%±0.013 |

*The synthesis of the monolayer graphene:* The monolayer graphene in this study was synthesized by a Cu-assisted chemical-vapor deposition method,<sup>1</sup> which was carried out in high temperature three-zone tube furnace at 1000 °C using a mixed gas of CH<sub>4</sub> (40 SCCM) and H<sub>2</sub> (20 SCCM) as reaction source, and 20 μm as collection substrate. After synthesis, the monolayer graphene was spin-coated with 5wt.% polymethylmethacrylate (PMMA) in chlorobenzene, and then the underlying Cu foil was etched by a Marble's reagent solution (CuSO<sub>4</sub>:HCl:H<sub>2</sub>)=10 g:50 ml:50 ml). The graphene film was then rinsed by distilled water to remove remaining ions. To analyze the structures of the as-deposited graphene, the graphene was directly transferred onto SiO<sub>2</sub>/Si substrate and the PMMA was then removed by acetone.

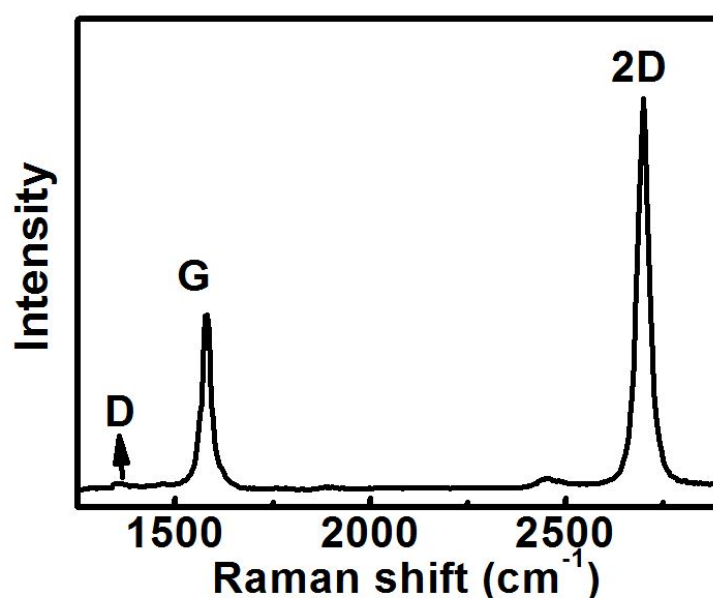

Figure S3. Raman spectrum of the monolayer graphene film, the inset shows a typical camera picture of the

graphene film on Si substrate.

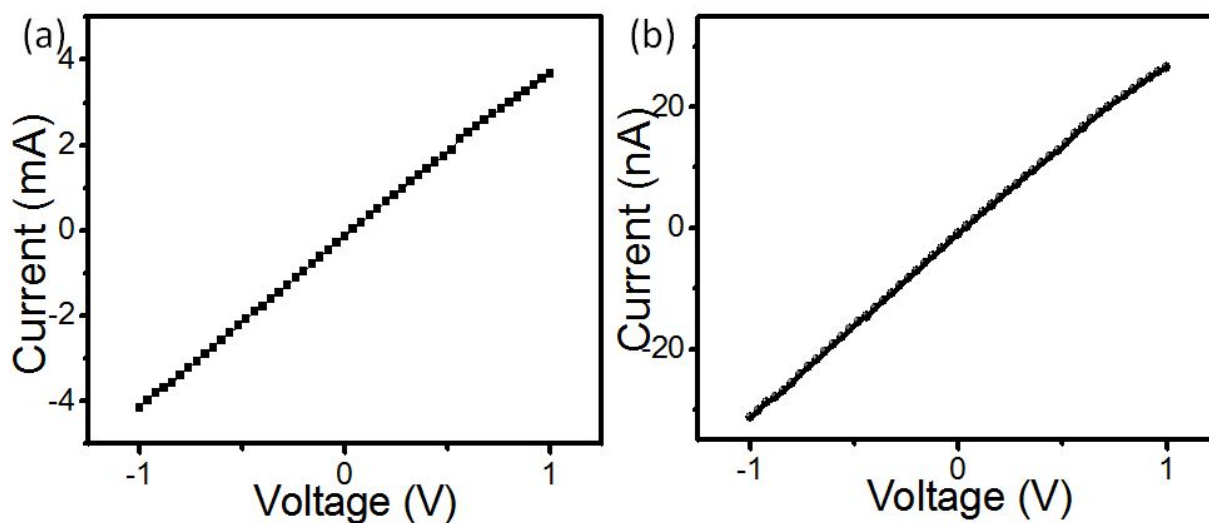

Figure S4.  $I$ - $V$  curves of MLG/silver paste contact, and Ti/Au electrode/Si NW (Sample B) contact.

#### The concentration of boron in Sample C.

Although it is impossible to precisely determine the chemical concentration in Sample C by XPS, the boron contents can be calculated to be  $8.11 \times 10^{16} \text{ cm}^{-3}$  by using the transfer characteristics of SiNW based FET. Thus the boron content in Sample C is  $8.11 \times 10^{16} / 5.03 \times 10^{22} = 1.61 \times 10^{-6}$ .

#### Reference:

1. B. Nie, J. G. Hu, L. B. Luo, C. Xie, L. H. Zeng, P. Lv, F. Z. Li, J. S. Jie, M. Feng, C. Y. Wu, Y. Q. Yu, S. H. Yu, *Small*, 2013, 9, 2872-2879.
